# Supplementary material
Source: Springer Nature journal article supplement (https://www.springermedizin.de/resource/supplementary/12879_2012_1931_MOESM3_ESM.pdf/9443270)

**Alere**

Alere Determine™ TB LAM Ag  
Reference Scale Card

- Hold the card alongside the patient window and read the result
- Store the card in the kit pouch away from direct light and heat
- Do not use the card beyond the expiration date

Positive

Negative

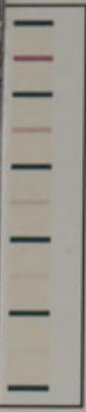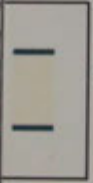

LOT See reverse REF 06740100/R1

EXP. 20  
B LAM Ag TB L

CONTROL  
CONTROL

PATIENT  
PATIENT

Control band

Patient sample result

Sample pad

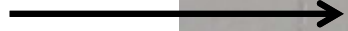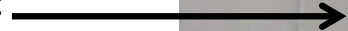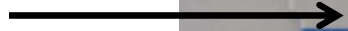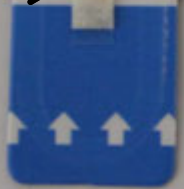

Supplement: MOESM3 [file 9443270]
